# Supplementary material
Source: HighWire-hosted journal article supplement (https://thorax.bmj.com/content/74/11/1037)
Supplement: inline-supplementary-material-1 [file inline-supplementary-material-1.pdf]

## **The five-year mortality and morbidity impact of a prolonged versus a brief ICU stay: a propensity score matched cohort study**

### **Online supplement**

Greet Hermans\*, MD, PhD<sup>1,2</sup>, Nathalie Van Aerde\*, MD<sup>1</sup>, Philippe Meersseman, MD<sup>2</sup>, Helena Van Mechelen, PT, PhD<sup>1</sup>, Yves Debaveye MD, PhD<sup>1,3</sup>, Alexander Wilmer, MD, PhD<sup>2</sup>, Jan Gunst MD, PhD<sup>1,3</sup>, Michael P. Casaer, MD, PhD<sup>1,3</sup>, Jasperina Dubois, MD<sup>4</sup>, Pieter J. Wouters, MSc<sup>1,3</sup>, Rik Gosselink, PT, PhD<sup>5</sup>, Greet Van den Berghe, MD, PhD<sup>1,3</sup>

<sup>1</sup> Department of Cellular and Molecular Medicine, KU Leuven, Herestraat 49, B-3000 Leuven, Belgium;

<sup>2</sup> Medical Intensive Care Unit, Department of General Internal Medicine, University Hospitals Leuven, Herestraat 49, B-3000 Leuven, Belgium;

<sup>3</sup> Department of Intensive Care Medicine, University Hospitals Leuven, Herestraat 49, B-3000 Leuven, Belgium;

<sup>4</sup> Department of Anaesthesia and Intensive Care Medicine, Jessa Hospitals, Stadsomvaart 11, B-3500 Hasselt, Belgium;

<sup>5</sup> Department of Rehabilitation Sciences, KU Leuven, Herestraat 49, B-3000 Leuven, Belgium;

\*contributed equally

### **Corresponding author:**

Greet Hermans, MD, PhD, Medical Intensive Care Unit, Department of General Internal Medicine, UZ Leuven, Herestraat 49, B-3000 Leuven, Belgium Tel: +32-16-344275, Fax: +32-16-344230, Email: [greet.hermans@uzleuven.be](mailto:greet.hermans@uzleuven.be)

## Methods

### Outcomes

Secondary endpoints comprised three distinct measures of clinical status reported to be impaired in survivors up to years following ICU admission, [1-4] including evaluation of muscle strength with handgrip strength (HGF, %pred), [5] exercise capacity with 6-minute-walk distance (6-MWD, %pred), [6] indicative for activity limitation and physical functioning with the Physical Function score of the SF-36 quality of life measure (PF SF-36, range 0-100 with higher values indicating better scores). [7, 8]

To further characterize physical and functional limitations, additional measurements were performed. These comprised global assessment of muscle strength with the MRC sum score (range 0-60, higher values indicating higher strength), isometric muscle strength with hand held dynamometry for the same muscle groups as included in the MRC evaluation, maximal inspiratory pressure, the physical and mental component score of the SF-36, representing the respective health summaries of the questionnaire (PCS and MCS, range 0-100 with higher values indicating better scores) and the Barthel-index, a scale to measure performance in daily life activities (range 0-20, lower values indicating more disability). [9]

#### 1. Handgrip strength

Handgrip strength was measured with a hydraulic handgrip dynamometer (Jamar Preston, Jackson, Michigan, USA) as previously described. [10] The dynamometer was regularly calibrated. Measurements were performed by the same four experienced physiotherapists (TVH, SV, TVA, HVM). Measurements were standardly performed on the right side. In case of focal or regional problems for certain muscle groups, evaluation was performed on the contralateral side. Care was taken to perform measurements with the elbow in 90 degrees flexion. Handgrip strength was determined as the highest of 3 attempts. Values were expressed as percent of predicted values for sex and age.[5]

#### 2. 6-minute walk distance

The 6-minute walking distance (6MWD) was performed in a 30-meter corridor or on the side-walk during home visits, according to the ATS guidelines. [11] Results were expressed as percent predicted. [6] For patients unable to perform the test due to physical limitations, a zero value was imputed as performed in earlier work. [12, 13]

#### 3. Quality of life questionnaire

The quality of life was assessed with The Medical Outcomes Report – Short Form 36 (SF36) questionnaire. [7, 8] The SF-36 includes 8 scores, consisting of multiple items, that assess 8 domains, including physical and social functioning, physical and emotional role, mental health, pain, vitality and general health. In addition, 2 summary scores, physical component summary (PCS) and mental component summary (MCS) are calculated. Scores range from 0 – 100 with lower scores indicating more disability and higher scores indicating less disability.

#### 4. Medical Research Council sum score

MRC sum score was measured as described earlier. [10] Six muscle groups were evaluated (abduction of the shoulder, flexion of the elbow, extension of the wrist, flexion of the hip, extension of the knee and dorsal flexion of the foot) bilaterally and scored between 0 and 5 (0= no visible/palpable contraction, 1= visible/palpable contraction without movement of the limb, 2= movement of the limb but not against gravity, 3= movement against gravity (almost full passive range of motion) but not against resistance, 4= movement against gravity and resistance, arbitrarily judged to be submaximal for sex and age, 5= normal). Measurements were performed by one of four physiotherapists (TVH, SV, TVA, HVM) who were extensively trained before the start of the study.

#### 5. Hand held dynamometry

Isometric muscle force was measured using a hand held dynamometry (CompuFet 2; Biometrics, Almere, The Netherlands) that was connected to a laptop as previously described. [14] The same muscle groups involved in the MRC sum score were evaluated. Measurements were performed by the same four experienced physiotherapists (TVH, SV, TVA, HVM). Measurements were standardly performed on the right side. In case of

focal or regional problems for certain muscle groups, evaluation was performed on the contralateral side. Values were expressed as percent of predicted values for sex and age.[15]

## **6. Maximal Inspiratory Pressure**

We measured maximal static inspiratory pressure (MIP) according to the ATS guidelines.[16] Measurements were performed by the same four experienced physiotherapists (TVH, SV, TVA, HVM), specifically trained for this by the pulmonary function technicians. We used a mouthpiece that incorporated a small leak to prevent glottis closure during the inspiratory manoeuvre. Pressures were measured with the Micro Medical respiratory pressure meter, CareFusion® using Puma PC software. The patient was asked to perform a maximal inspiratory manoeuvre starting from functional residual capacity. Maximal static inspiratory pressure was determined as the mouth pressure measure at the side port of a mouthpiece, maintained for 1 second. The best of 3 consecutive measurements was recorded.

## **7. Activities of daily living**

The Barthel Index was used to assess independence during 10 daily life activities, including presence or absence of faecal and urinary incontinence, need of help with grooming, toilet use, feeding, transfers, walking, dressing, climbing stairs and bathing. Higher scores indicate higher level of independence, with a maximum score of 20.[9]

## **Statistics**

### **1. Total and post- acute phase five-year mortality**

#### ***Propensity score matching***

To compare total and post-acute phase five-year mortality between short-and long-stay patients, we selected a subset of patients with short and prolonged ICU stay matched for randomization to early or late PN, baseline risk factors (age, gender, BMI, nutritional risk score), co-morbidities (diabetes, malignancy, pre-admission dialysis), type of illness (cardiac surgery, emergency admission to surgical ICU, elective admission to surgical ICU, medical ICU and sepsis upon admission), presence or absence of sepsis and severity of illness (APACHE II). Matching was based on propensity scores obtained by logistic regression and using one-to-one nearest neighbour matching without replacement with prolonged ICU stay as the dependent variable. A calliper of 0.2 was used and satisfactory matching was evaluated based on an absolute standardized difference in means less than or equal to 0.1 for all variables.

Comparisons between short and long-stayers were made in the matched population, and for completeness, also in the total population. Total and post-acute phase five-year mortality for short-and long-stayers were reported as proportions and compared by Chi-square statistics. For time-to-event analyses, comparisons for patients with short and prolonged ICU stay were performed with the log-rank test and visualized with Kaplan-Meier plots. Effect size was calculated with univariable Cox-proportional hazard regression analyses.

#### ***Exploratory analyses of factors explaining effects of prolonged ICU stay on total and post-acute phase five-year mortality***

To further explore which characteristics of the prolonged ICU stay may explain its possible adverse association with mortality, multivariable Cox proportional hazards analyses were performed in the total EPaNIC population with backward models, likelihood ratio, probability to enter 0.05, removal 0.2.

First, multivariable Cox regression models were built, introducing prolonged ICU stay along with baseline risk factors (randomization, co-morbidities, type and severity of illness) that showed a  $P$ -value  $\leq 0.2$  with the outcome in univariable regression analyses. The 16 admission categories were grouped into four main categories for these analyses as done previously.[12] Next, another set of multivariable Cox regression models were created in which prolonged ICU stay was replaced by ICU interventions and events that showed a  $P$ -value  $\leq 0.2$  in univariable analyses with the outcome studied. Continuous ICU variables were dichotomized on median values for the total population to provide sufficient overlap between short-and long-stay patients. Liver dysfunction was defined as bilirubin  $>3\text{mg/dL}$ . [17] Prior to entering these variables, co-linearity was checked and judged problematic in case of variation inflation factor  $>5$  or tolerance  $<0.2$ . Accuracy of these factors to discriminate prolonged ICU stay was evaluated with receiver operating characteristic (ROC) curve and c-statistic.

Bootstrapping (n=1000) was performed on the final multivariable models to obtain robust estimators of the

confidence intervals for each of the regression coefficients.

### ***Sensitivity analyses***

To validate our definition of prolonged ICU stay, we evaluated the optimal cut-off for ICU stay to predict total and post-acute phase five-year mortality, based on martingale residual plots with LOcal regrESSion (LOESS) lines.[18]

At each step of the cox regression analyses, the proportional hazard assumption was checked for each variable retained in the model with use of log-minus-log (LML) plots for categorical variables, partial residuals (PR) plots for continuous variables and, if unclear, by entering the variable as a time-dependent covariate. At each step of the multivariable Cox regression analyses, sensitivity analyses were performed by adding the factors for which this assumption were violated as time-dependent covariates.

## **2. Five-year morbidity**

### ***Propensity score matching***

#### *Short-and long-stay patients*

To compare five-year morbidity between short-and long-stay patients we selected a subset of patients with short and prolonged ICU stay, matched for randomization, baseline risk factors, including co-morbidities, type and severity of illness. Matching for demographics, co-morbidities and severity of illness upon admission was performed as described above. Post-hoc, ICU admission quality of life data (SF-36 questionnaire) and performance in daily life activities (Barthel index) were collected at the five-year follow-up visit as supplementary information on the pre-morbid status. These data were not used in the matching procedure as recollection of pre-morbid state may have been flawed by the post-ICU trajectory.[19] For completeness, also comparisons of outcomes between short-and long-stay patients in the total sample for which morbidity data were available were provided.

#### *Patients and controls*

Morbidity outcomes of the former ICU patients were further referenced to controls in a subset matched for demographics including age, sex and BMI, and for completeness, also in the total population of patients and controls. To obtain satisfactory matching, repeated one-to-one nearest neighbour matching without replacement was performed based on propensity scores obtained by logistic regression with patients versus controls as dependent variable and age as covariate. This procedure was repeated as long as satisfactory matching for all 50 controls was obtained within the remaining patient population. This resulted in a 1:6 matching (50 controls and 300 patients). Final balance for each of the covariates was checked by chi-square and Mann-Whitney U test before examining any results.

### ***Exploratory analyses of factors explaining effects of prolonged ICU stay on five-year morbidity***

To further explore which characteristics of the prolonged ICU stay may explain any possible adverse association on the secondary outcomes, linear regression models were performed in the subset of five-year EPaNIC survivors who were evaluated at five years, with backward models, probability for enter 0.05, removal 0.2.

First, multivariable regression models were built, introducing prolonged ICU stay along with baseline risk factors (randomization, co-morbidities, type and severity of illness) that showed a  $P$ -value  $\leq 0.2$  with the outcome in univariable regression analyses. The 16 admission categories were grouped into four main categories for these analyses as done previously.[12] Next, another set of multivariable regression models were created in which prolonged ICU stay was replaced by ICU interventions and events that showed a  $P$ -value  $\leq 0.2$  in univariable analyses with the outcome studied. In order to obtain adequate model fit, the 6 MWD data were transformed to power 2 and the PF-SF36 were reversed (100 minus actual value) and subsequently transformed to power 0.54.

Bootstrapping ( $n=1000$ ) was performed on the final multivariable models to obtain robust estimators of the confidence intervals for each of the regression coefficients.

**Supplementary figure 1:** Distribution of propensity scores of unmatched and matched subsets of EPaNIC patients, for five year mortality, post-acute five year mortality and five year morbidity analysis.

**Supplementary figure 2:** Receiver operating characteristic (ROC) curve, generated from the binary logistic regression analyses with prolonged ICU stay as the dependent variable and ICU-related exposure variables as the independent variables. Area under the curve=0.968.

These ICU-related exposure variables included: age, sex (male versus female), BMI NRS ( $\geq 5$  versus  $< 5$ ), Diabetes mellitus Malignancy, Pre-admission dialysis, Randomization (late versus early PN), APACHE II, Admission categories (cardiac surgery, emergency surgery, elective surgery, MICU), sepsis upon admission

**Abbreviations:** BMI: body mass index; NRS: nutritional risk score; PN: parenteral nutrition APACHE II: Acute Physiology And Chronic Health Evaluation; MICU: Medical Intensive Care Unit

**Supplementary figure 3:** Plot of martingale residuals versus duration of ICU stay. Martingale residuals were calculated from univariable Cox-proportional hazard analyses of total five-year mortality with ICU stay as the independent variable. LOESS lines (in red) indicate a breaking point around six to eight days. The right panel provides details of the main area of interest from the left panel. The blue lines represent the actually applied cut-off to define long-stayers.

| <b>Suppl. Table 1: Reasons for exclusion from morbidity analyses within eligible patients\$</b>                                                                                                                                                                                             |                                |                             |
|---------------------------------------------------------------------------------------------------------------------------------------------------------------------------------------------------------------------------------------------------------------------------------------------|--------------------------------|-----------------------------|
|                                                                                                                                                                                                                                                                                             | Short-stay eligible<br>N= 2436 | Long-stay eligible<br>N=578 |
| Short stay not in random selection                                                                                                                                                                                                                                                          | 1721                           | NA                          |
| Died after five years, before planned testing                                                                                                                                                                                                                                               | 6                              | 12                          |
| Lost to follow-up/ living abroad                                                                                                                                                                                                                                                            | 42                             | 51                          |
| Time window passed                                                                                                                                                                                                                                                                          | 14                             | 8                           |
| Language barrier                                                                                                                                                                                                                                                                            | 0                              | 2                           |
| Pre-existent (pre-ICU) neuromuscular disorder <sup>5</sup>                                                                                                                                                                                                                                  | 18                             | 25                          |
| Unable to walk without assistance prior to ICU                                                                                                                                                                                                                                              | 2                              | 3                           |
| Cardiac assist device*                                                                                                                                                                                                                                                                      | 1                              | 0                           |
| Pulmonary resection (pneumonectomy)*                                                                                                                                                                                                                                                        | 6                              | 10                          |
| Psychiatric disease*                                                                                                                                                                                                                                                                        | 8                              | 11                          |
| Dementia*                                                                                                                                                                                                                                                                                   | 4                              | 1                           |
| Vegetative state*                                                                                                                                                                                                                                                                           | 0                              | 2                           |
| Hospitalized/Rehabilitation center/Nursing home*                                                                                                                                                                                                                                            | 17                             | 20                          |
| Refusal:                                                                                                                                                                                                                                                                                    |                                |                             |
| Good health                                                                                                                                                                                                                                                                                 | 17                             | 8                           |
| Poor health                                                                                                                                                                                                                                                                                 | 15                             | 20                          |
| Old age                                                                                                                                                                                                                                                                                     | 8                              | 2                           |
| Practical                                                                                                                                                                                                                                                                                   | 23                             | 24                          |
| Other follow-up programs                                                                                                                                                                                                                                                                    | 67                             | 34                          |
| Emotional reasons                                                                                                                                                                                                                                                                           | 12                             | 7                           |
| Not interested                                                                                                                                                                                                                                                                              | 35                             | 32                          |
| No reason                                                                                                                                                                                                                                                                                   | 22                             | 30                          |
| <sup>5</sup> Pre-ICU neuromuscular disorders were excluded by manual chart review of the medical history performed by study nurses, and when in doubt, discussed with the PI.<br>*present before follow-up evaluation<br><b>Abbreviations:</b> ICU: intensive care unit; NA: not applicable |                                |                             |

| <b>Suppl. Table 2: Characteristics of eligible patients according to inclusion status</b>                                                                                                                                                                                                                                                        |                                        |                        |         |                                      |                       |         |
|--------------------------------------------------------------------------------------------------------------------------------------------------------------------------------------------------------------------------------------------------------------------------------------------------------------------------------------------------|----------------------------------------|------------------------|---------|--------------------------------------|-----------------------|---------|
|                                                                                                                                                                                                                                                                                                                                                  | Short-stay eligible patients<br>N=2436 |                        |         | Long-stay eligible patients<br>N=578 |                       |         |
|                                                                                                                                                                                                                                                                                                                                                  | Included<br>N=398                      | Not included<br>N=2038 | P-value | Included<br>N=276                    | Not included<br>N=302 | P-value |
| <b>Baseline factors</b>                                                                                                                                                                                                                                                                                                                          |                                        |                        |         |                                      |                       |         |
| Age                                                                                                                                                                                                                                                                                                                                              | 61.4 (50.8-70.3)                       | 66.3 (55.7-74.2)       | <0.001  | 58.1 (48.4-68.8)                     | 57.1 (43.8-69.7)      | 0.514   |
| Gender, male                                                                                                                                                                                                                                                                                                                                     | 252 (63.3)                             | 1309 (64.2)            | 0.728   | 198 (71.7)                           | 178 (58.9)            | 0.001   |
| BMI                                                                                                                                                                                                                                                                                                                                              | 25.6 (23-28.4)                         | 26 (23.5-29.3)         | 0.009   | 25.8 (22.9-29.4)                     | 25.2 (22.4-28.4)      | 0.206   |
| NRS >5                                                                                                                                                                                                                                                                                                                                           | 69 (17.3)                              | 204 (10.0)             | <0.001  | 60 (10.4)                            | 80 (13.8)             | 0.183   |
| Diabetes mellitus                                                                                                                                                                                                                                                                                                                                | 57 (14.3)                              | 330 (16.2)             | 0.350   | 42 (15.2)                            | 36 (11.9)             | 0.247   |
| Malignancy                                                                                                                                                                                                                                                                                                                                       | 65 (16.3)                              | 234 (11.5)             | 0.007   | 41 (14.9)                            | 40 (13.2)             | 0.578   |
| Preadmission dialysis                                                                                                                                                                                                                                                                                                                            | 3 (0.8)                                | 19 (0.9)               | 1       | 0                                    | 2 (0.7)               | 0.500   |
| Randomisation, late PN                                                                                                                                                                                                                                                                                                                           | 222 (55.8)                             | 1014 (49.8)            | 0.028   | 122 (44.2)                           | 147 (48.7)            | 0.282   |
| APACHE II                                                                                                                                                                                                                                                                                                                                        | 19.5 (14-32)                           | 16 (13-21)             | <0.001  | 30 (22.9-29.4)                       | 31 (24-36)            | 0.558   |
| Admission category                                                                                                                                                                                                                                                                                                                               |                                        |                        | <0.001  |                                      |                       | 0.109   |
| Cardiac surgery                                                                                                                                                                                                                                                                                                                                  | 203 (51.0)                             | 1732 (85)              |         | 98 (35.5)                            | 80 (26.5)             |         |
| Elective SICU                                                                                                                                                                                                                                                                                                                                    | 36 (9.0)                               | 52 (2.6)               |         | 8 (2.8)                              | 7 (2.3)               |         |
| Emergent SICU                                                                                                                                                                                                                                                                                                                                    | 144 (36.2)                             | 201 (9.9)              |         | 139 (50.4)                           | 178 (58.9)            |         |
| MICU                                                                                                                                                                                                                                                                                                                                             | 15 (3.8)                               | 53 (2.6)               |         | 31 (11.2)                            | 37 (12.3)             |         |
| Sepsis on admission                                                                                                                                                                                                                                                                                                                              | 62 (15.6)                              | 165 (8.1)              | <0.001  | 114 (41.3)                           | 138 (45.7)            | 0.288   |
| ICU stay, days                                                                                                                                                                                                                                                                                                                                   | 3 (1-5)                                | 2 (1-3)                | <0.001  | 15 (11-25)                           | 15 (11-23)            | 0.674   |
| Continuous variables are expressed as median (IQR), dichotomous variables are expressed as numbers (percentages)<br>Abbreviations: BMI: body mass index; NRS: nutritional risk score; PN: parenteral nutrition; APACHE II: Acute Physiology And Chronic Health Evaluation; SICU: Surgical Intensive Care Unit; MICU: Medical Intensive Care Unit |                                        |                        |         |                                      |                       |         |

| <b>Suppl. Table 3: Baseline characteristics and ICU factors of the total population of short- versus long-stay patients included in the mortality and morbidity analyses</b>                                                                                             |                                               |                     |         |                                                                |                      |         |                            |                     |         |
|--------------------------------------------------------------------------------------------------------------------------------------------------------------------------------------------------------------------------------------------------------------------------|-----------------------------------------------|---------------------|---------|----------------------------------------------------------------|----------------------|---------|----------------------------|---------------------|---------|
|                                                                                                                                                                                                                                                                          | <b>All cause five-year mortality analyses</b> |                     |         | <b>All cause post-acute phase five-year mortality analyses</b> |                      |         | <b>Morbidity analyses</b>  |                     |         |
|                                                                                                                                                                                                                                                                          | Total population<br>N= 4619                   |                     |         | Total population<br>N= 4315                                    |                      |         | Total population<br>N= 674 |                     |         |
|                                                                                                                                                                                                                                                                          | Short-stay<br>N=3410                          | Long-stay<br>N=1209 | P-value | Short-stay<br>N= 3264                                          | Long-stay<br>N= 1051 | P-value | Short-stay<br>N=398        | Long-stay<br>N=276  | P-value |
| <b>Baseline factors</b>                                                                                                                                                                                                                                                  |                                               |                     |         |                                                                |                      |         |                            |                     |         |
| Age, median (IQR)                                                                                                                                                                                                                                                        | 67·1<br>(56·6-75·1)                           | 64·5<br>(53·9-74·5) | <0·001  | 66·8<br>(56·5-74·8)                                            | 63·7<br>(53·3-73·9)  | <0·001  | 61·4<br>(50·8-70·3)        | 58·1<br>(48·4-68·8) | 0·052   |
| Sex, male (%)                                                                                                                                                                                                                                                            | 2187 (64·1)                                   | 774 (64)            | 0·943   | 2093 (64·1)                                                    | 677 (64·4)           | 0·864   | 252 (63·3)                 | 198 (71·7)          | 0·022   |
| BMI, median (IQR)                                                                                                                                                                                                                                                        | 25·9<br>(23·2-29·1)                           | 25·3<br>(22·6-28·9) | 0·002   | 25·9<br>(23·3-29·1)                                            | 25·3<br>(22·7-29)    | 0·003   | 25·6<br>(23-28·4)          | 25·8<br>(22·9-29·4) | 0·419   |
| NRS ≥ 5 (%)                                                                                                                                                                                                                                                              | 471 (13·8)                                    | 385 (31·8)          | <0·001  | 422 (12·9)                                                     | 315 (30)             | <0·001  | 69 (17·3)                  | 60 (21·7)           | 0·153   |
| Diabetes mellitus (%)                                                                                                                                                                                                                                                    | 602 (17·7)                                    | 204 (16·9)          | 0·539   | 570 (17·5)                                                     | 166 (15·8)           | 0·211   | 57 (14·3)                  | 42 (15·2)           | 0·747   |
| Malignancy (%)                                                                                                                                                                                                                                                           | 603 (17·7)                                    | 288 (23·8)          | <0·001  | 564 (17·3)                                                     | 241 (22·9)           | <0·001  | 65 (16·3)                  | 41 (14·9)           | 0·605   |
| Pre-admission dialysis (%)                                                                                                                                                                                                                                               | 46 (1·3)                                      | 23 (1·9)            | 0·173   | 40 (1·2)                                                       | 18 (1·7)             | 0·233   | 3 (0·8)                    | 0                   | 0·273   |
| Randomization, late PN (%)                                                                                                                                                                                                                                               | 1748 (51·3)                                   | 570 (47·1)          | 0·014   | 1678 (51·4)                                                    | 488 (46·4)           | 0·005   | 222 (55·8)                 | 122 (44·2)          | 0·003   |
| APACHE II, median (IQR)                                                                                                                                                                                                                                                  | 17 (13-26)                                    | 32 (25-38)          | <0·001  | 17 (13-24)                                                     | 32 (24-37)           | <0·001  | 19·5 (14-32)               | 30 (23-36·8)        | <0·001  |
| Admission category (%)                                                                                                                                                                                                                                                   |                                               |                     | <0·001  |                                                                |                      | <0·001  |                            |                     | <0·001  |
| Cardiac surgery                                                                                                                                                                                                                                                          | 2463 (72·2)                                   | 347 (28·7)          |         | 2413 (73·9)                                                    | 313 (29·8)           |         | 203 (51)                   | 98 (35·5)           |         |
| Emergency SICU                                                                                                                                                                                                                                                           | 552 (16·2)                                    | 607 (50·2)          |         | 493 (15·1)                                                     | 543 (51·7)           |         | 144 (36·2)                 | 139 (50·4)          |         |
| Elective SICU                                                                                                                                                                                                                                                            | 222 (6·5)                                     | 54 (4·5)            |         | 217 (6·6)                                                      | 49 (4·7)             |         | 36 (9)                     | 8 (2·9)             |         |
| MICU                                                                                                                                                                                                                                                                     | 173 (5·1)                                     | 201 (16·6)          |         | 141 (4·3)                                                      | 146 (13·9)           |         | 15 (3·8)                   | 31 (11·2)           |         |
| Sepsis upon admission (%)                                                                                                                                                                                                                                                | 423 (12·4)                                    | 586 (48·5)          | <0·001  | 360 (11·0)                                                     | 492 (46·8)           | <0·001  | 62 (15·6)                  | 114 (41·3)          | <0·001  |
| <b>ICU-related exposure variables</b>                                                                                                                                                                                                                                    |                                               |                     |         |                                                                |                      |         |                            |                     |         |
|                                                                                                                                                                                                                                                                          | Short-stay<br>N=3410                          | Long-stay<br>N=1209 | p-value | Short-stay<br>N= 3264                                          | Long-stay<br>N= 1051 | p-value | Short-stay<br>N=398        | Long-stay<br>N=276  | p-value |
| Mean morning glycaemia > 103 mg/dl                                                                                                                                                                                                                                       | 1658 (49)                                     | 629 (52)            | 0·075   | 1587 (49)                                                      | 541 (51·5)           | 0·171   | 202 (50·8)                 | 153 (55·4)          | 0·231   |
| Mean insulin dose >43·43 U/d                                                                                                                                                                                                                                             | 1451 (42·6)                                   | 855 (70·7)          | <0·001  | 1382 (42·3)                                                    | 741 (70·5)           | <0·001  | 170 (42·7)                 | 216 (78·3)          | <0·001  |
| Hypoglycaemia during intervention <sup>a</sup>                                                                                                                                                                                                                           | 60 (1·8)                                      | 66 (5·5)            | <0·001  | 50 (1·5)                                                       | 51 (4·9)             | <0·001  | 4 (1)                      | 9 (3·3)             | 0·036   |
| Corticosteroids                                                                                                                                                                                                                                                          | 531 (15·6)                                    | 621 (51·4)          | <0·001  | 460 (14·1)                                                     | 525 (50)             | <0·001  | 99 (24·9)                  | 124 (44·9)          | <0·001  |
| NMBA                                                                                                                                                                                                                                                                     | 214 (6·3)                                     | 673 (55·7)          | <0·001  | 159 (4·9)                                                      | 578 (55)             | <0·001  | 28 (7)                     | 157 (56·9)          | <0·001  |
| Benzodiazepines > 1 day                                                                                                                                                                                                                                                  | 719 (21·1)                                    | 1062 (87·8)         | <0·001  | 646 (19·8)                                                     | 922 (87·7)           | <0·001  | 103 (25·9)                 | 244 (88·4)          | <0·001  |
| Opioids > 3 days                                                                                                                                                                                                                                                         | 729 (21·4)                                    | 1102 (91·1)         | <0·001  | 669 (20·5)                                                     | 969 (92·2)           | <0·001  | 113 (28·4)                 | 261 (94·6)          | <0·001  |
| Propofol > 1 day                                                                                                                                                                                                                                                         | 1005 (29·5)                                   | 973 (80·5)          | <0·001  | 952 (29·2)                                                     | 858 (81·6)           | <0·001  | 139 (34·9)                 | 243 (88)            | <0·001  |
| Clonidine                                                                                                                                                                                                                                                                | 60 (1·8)                                      | 245 (20·3)          | <0·001  | 57 (1·7)                                                       | 227 (21·6)           | <0·001  | 9 (2·3)                    | 79 (28·6)           | <0·001  |
| Ketamine                                                                                                                                                                                                                                                                 | 9 (0·3)                                       | 50 (4·1)            | <0·001  | 8 (0·2)                                                        | 48 (4·6)             | <0·001  | 3 (0·8)                    | 9 (3·3)             | 0·019   |
| Mechanical ventilation > 2 days                                                                                                                                                                                                                                          | 632 (18·5)                                    | 1130 (93·5)         | <0·001  | 553 (16·9)                                                     | 978 (93·1)           | <0·001  | 100 (25·1)                 | 261 (94·6)          | <0·001  |
| Vasopressors/ inotropes> 2 days                                                                                                                                                                                                                                          | 805 (23·6)                                    | 1002 (82·9)         | <0·001  | 731 (22·4)                                                     | 868 (82·6)           | <0·001  | 102 (25·6)                 | 224 (81·2)          | <0·001  |
| Bilirubin>3 mg/dl                                                                                                                                                                                                                                                        | 244 (7·2)                                     | 389 (32·2)          | <0·001  | 207 (6·4)                                                      | 317 (30·2)           | <0·001  | 36 (9·1)                   | 84 (30·4)           | <0·001  |
| New dialysis                                                                                                                                                                                                                                                             | 54 (1·6)                                      | 304 (25·1)          | <0·001  | 20 (0·6)                                                       | 242 (23)             | <0·001  | 2 (0·5)                    | 55 (19·9)           | <0·001  |
| New infection                                                                                                                                                                                                                                                            | 229 (6·7)                                     | 897 (74·2)          | <0·001  | 199 (6·1)                                                      | 790 (75·2)           | <0·001  | 24 (6)                     | 206 (74·6)          | <0·001  |
| <b>Abbreviations:</b> BMI: body mass index; NRS: nutritional risk score; PN: parenteral nutrition; APACHE II: Acute Physiology And Chronic Health Evaluation; SICU: Surgical Intensive Care Unit; MICU: Medical Intensive Care Unit; NMBA: neuromuscular blocking agents |                                               |                     |         |                                                                |                      |         |                            |                     |         |
| <sup>a</sup> Intervention involved early (within 48h) versus late (not within the first week) parenteral substitution of deficient enteral nutrition                                                                                                                     |                                               |                     |         |                                                                |                      |         |                            |                     |         |

| Suppl. Table 4: Post-hoc pre-morbid status in short- versus long-stay patients for total and matched population included in the morbidity analyses |                              |                    |         |                            |                    |         |
|----------------------------------------------------------------------------------------------------------------------------------------------------|------------------------------|--------------------|---------|----------------------------|--------------------|---------|
|                                                                                                                                                    | Matched population<br>N= 408 |                    |         | Total population<br>N= 674 |                    |         |
|                                                                                                                                                    | Short-stay<br>N=204          | Long-stay<br>N=204 | P-value | Short-stay<br>N=398        | Long-stay<br>N=276 | P-value |
| PF SF 36, median (IQR)                                                                                                                             | 70 (30-100)                  | 85·0 (45·5-100)    | 0·100   | 75 (40-95)                 | 85 (45-100)        | 0·016   |
| PCS, median (IQR)                                                                                                                                  | 43·1 (31·9-56·0)             | 48·4 (34·7-57·9)   | 0·029   | 44·6 (33·8-55·6)           | 49·6 (35·4-57·9)   | 0·005   |
| MCS, median (IQR)                                                                                                                                  | 52·4 (43·4-58·0)             | 51·6 (42·8-57·7)   | 0·659   | 52·7 (44·1-57·9)           | 51·7 (41·1-57·6)   | 0·155   |
| Abbreviations: PF SF-36: physical function of the 36-item short form health survey; PCS: physical component score; MCS: mental component score     |                              |                    |         |                            |                    |         |

| Suppl. Table 5: Demographics of patients and controls in morbidity analyses |                           |                  |         |                         |                   |         |
|-----------------------------------------------------------------------------|---------------------------|------------------|---------|-------------------------|-------------------|---------|
|                                                                             | Matched population N= 350 |                  |         | Total population N= 724 |                   |         |
|                                                                             | Patients<br>N=300         | Controls<br>N=50 | P-value | Patients<br>N= 674      | Controls<br>N= 50 | P-value |
| Age                                                                         | 62 (58-68)                | 61 (57-66)       | 0·218   | 65 (55-75)              | 61 (57-66)        | 0·058   |
| Sex, male (%)                                                               | 205 (68·3)                | 35 (70)          | 0·814   | 450 (66·77)             | 35 (70)           | 0·639   |
| BMI                                                                         | 27·3 (24·0-30·8)          | 26·4(23·7-29·3)  | 0·282   | 26·8 (23·8-30·0)        | 26·4 (23·7-29·3)  | 0·653   |
| Abbreviations: BMI: body mass index                                         |                           |                  |         |                         |                   |         |



| Suppl. Table 6: Morbidity analyses in five-year survivors and controls                                                                                                                                                                                                                              |                              |                   |         |                            |                   |         |                               |                              |         |                               |                              |         |
|-----------------------------------------------------------------------------------------------------------------------------------------------------------------------------------------------------------------------------------------------------------------------------------------------------|------------------------------|-------------------|---------|----------------------------|-------------------|---------|-------------------------------|------------------------------|---------|-------------------------------|------------------------------|---------|
|                                                                                                                                                                                                                                                                                                     | Matched population<br>N= 350 |                   |         | Total population<br>N= 724 |                   |         | Matched population<br>N= 408  |                              |         | Total population<br>N= 674    |                              |         |
|                                                                                                                                                                                                                                                                                                     | Patients<br>N= 300           | Controls<br>N= 50 | P-value | Patients<br>N= 674         | Controls<br>N= 50 | P-value | Short-stay patients<br>N= 204 | Long-stay patients<br>N= 204 | P-value | Short-stay patients<br>N= 398 | Long-stay patients<br>N= 276 | P-value |
| Strength                                                                                                                                                                                                                                                                                            |                              |                   |         |                            |                   |         |                               |                              |         |                               |                              |         |
| MRC sum score                                                                                                                                                                                                                                                                                       | 60(58-60)                    | 60(60-60)         | <0.001  | 60(58-60)                  | 60(60-60)         | <0.001  | 60(57-60)                     | 60(57-60)                    | 0.254   | 60(58-60)                     | 60(58-60)                    | 0.049   |
| HGF (%pred)                                                                                                                                                                                                                                                                                         | 89(73-104)                   | 104(91-117)       | <0.001  | 87(70-104)                 | 104(91-117)       | <0.001  | 87(73-103)                    | 83(60-100)                   | 0.020   | 88 (73-104)                   | 86 (63-104)                  | 0.035   |
| HHD (%pred)                                                                                                                                                                                                                                                                                         |                              |                   |         |                            |                   |         |                               |                              |         |                               |                              |         |
| Shoulder                                                                                                                                                                                                                                                                                            | 91(76-106)                   | 98(86-119)        | 0.006   | 89(74-106)                 | 98(86-119)        | 0.001   | 88(75-102)                    | 85(65-104)                   | 0.250   | 91(77-108)                    | 88(68-105)                   | 0.007   |
| Elbow                                                                                                                                                                                                                                                                                               | 84(72-97)                    | 101(87-116)       | <0.001  | 84(71-99)                  | 101(87-116)       | <0.001  | 83(71-97)                     | 79(64-97)                    | 0.148   | 86(73-100)                    | 82(66-97)                    | 0.003   |
| Wrist                                                                                                                                                                                                                                                                                               | 97(84-115)                   | 109(93-122)       | 0.004   | 98(82-115)                 | 109(93-122)       | 0.004   | 97(81-112)                    | 94(77-111)                   | 0.126   | 99(84-116)                    | 96(79-112)                   | 0.004   |
| Hip                                                                                                                                                                                                                                                                                                 | 144(123-171)                 | 165(134-183)      | 0.006   | 143(120-168)               | 165(134-183)      | 0.001   | 146(119-170)                  | 134(110-157)                 | 0.001   | 149(125-174)                  | 135(113-158)                 | <0.001  |
| Knee                                                                                                                                                                                                                                                                                                | 52(43-60)                    | 65(53-74)         | <0.001  | 52(42-62)                  | 65(53-74)         | <0.001  | 50(42-62)                     | 49(38-59)                    | 0.083   | 53(44-64)                     | 51(39-59)                    | 0.002   |
| Ankle                                                                                                                                                                                                                                                                                               | 72(60-85)                    | 91(74-108)        | <0.001  | 73(59-86)                  | 91(74-108)        | <0.001  | 72(58-86)                     | 67(52-79)                    | 0.004   | 75(61-90)                     | 68(54-81)                    | <0.001  |
| MIP (%pred)                                                                                                                                                                                                                                                                                         | 90(71-11)                    | 104(85-124)       | 0.004   | 90(69-111)                 | 104(85-124)       | 0.001   | 92(71-115)                    | 87(64-105)                   | 0.021   | 91(71-113)                    | 88(65-105)                   | 0.077   |
| Exercise capacity                                                                                                                                                                                                                                                                                   |                              |                   |         |                            |                   |         |                               |                              |         |                               |                              |         |
| 6MWD (%pred)                                                                                                                                                                                                                                                                                        | 95(79-107)                   | 117(107-125)      | <0.001  | 92(75-104)                 | 117(107-125)      | <0.001  | 94(76-105)                    | 85(69-101)                   | 0.005   | 93(78-105)                    | 89(72-103)                   | 0.036   |
| Quality of life                                                                                                                                                                                                                                                                                     |                              |                   |         |                            |                   |         |                               |                              |         |                               |                              |         |
| PF SF-36                                                                                                                                                                                                                                                                                            | 75 (50-90)                   | 95 (90-100)       | <0.001  | 75 (45-90)                 | 95 (90-100)       | <0.001  | 75(55-90)                     | 65 (35-90)                   | 0.002   | 75 (50-90)                    | 70 (35-90)                   | 0.010   |
| PCS                                                                                                                                                                                                                                                                                                 | 48(37-55)                    | 55(51-58)         | <0.001  | 46(35-54)                  | 55(51-58)         | <0.001  | 47(38-55)                     | 43(32-52)                    | 0.003   | 47(37-55)                     | 45 (33-52)                   | 0.013   |
| MCS                                                                                                                                                                                                                                                                                                 | 55(49-59)                    | 58(53-60)         | 0.049   | 55(46-59)                  | 58(53-60)         | 0.046   | 56(48-60)                     | 54(45-59)                    | 0.053   | 55(47-59)                     | 54(45-59)                    | 0.206   |
| ADL                                                                                                                                                                                                                                                                                                 |                              |                   |         |                            |                   |         |                               |                              |         |                               |                              |         |
| Barthel index                                                                                                                                                                                                                                                                                       | 20 (19-20)                   | 20 (20-20)        | 0.020   | 20 (19-20)                 | 20 (20-20)        | 0.006   | 20 (19-20)                    | 20 (18-20)                   | <0.001  | 20 (19-20)                    | 20 (18-20)                   | 0.001   |
| Abbreviations: MRC: Medical Research Council; HGF: hand grip force; HHD: hand held dynamometry; MIP: maximal inspiratory pressure; PF SF-36: physical function of the 36-item short form health survey; PCS: physical component score; MCS: mental component score; ADL: activities of daily living |                              |                   |         |                            |                   |         |                               |                              |         |                               |                              |         |

| <b>Suppl. Table 7: Multivariable analyses of hand-grip strength (% predicted), 6MWD (% predicted) and PF SF36 in five-year survivors</b>                                                                                                  |                                                                  |         |                                                                  |         |                                                                  |         |
|-------------------------------------------------------------------------------------------------------------------------------------------------------------------------------------------------------------------------------------------|------------------------------------------------------------------|---------|------------------------------------------------------------------|---------|------------------------------------------------------------------|---------|
|                                                                                                                                                                                                                                           | <b>Hand-grip strength</b>                                        |         | <b>6-MWD b</b>                                                   |         | <b>PF SF36 c</b>                                                 |         |
|                                                                                                                                                                                                                                           | Unstandardized coefficients (B) (95% BCa confidence intervals) a | P-value | Unstandardized coefficients (B) (95% BCa confidence intervals) a | P-value | Unstandardized coefficients (B) (95% BCa confidence intervals) a | P-value |
| <b>Models with baseline factors and prolonged ICU stay</b>                                                                                                                                                                                |                                                                  |         |                                                                  |         |                                                                  |         |
| Age                                                                                                                                                                                                                                       | NA                                                               | NA      | NA                                                               | NA      | 0.068 (0.051-0.085)                                              | 0.001   |
| Sex. male                                                                                                                                                                                                                                 | 14.098 (10.081-18.018)                                           | 0.001   | 984.794 (341.928-1620.014)                                       | 0.006   | -1.195 (-1.715 to -0.672)                                        | 0.001   |
| BMI other than 25-40                                                                                                                                                                                                                      | -4.554 (-8.181 to -0.538)                                        | 0.022   | NA                                                               | NA      | -0.412 (-0.909-0.102)                                            | 0.114   |
| NRS≥5                                                                                                                                                                                                                                     | -3.598 (-9.045 to 1.999)                                         | 0.187   | NA                                                               | NA      | NA                                                               | NA      |
| Diabetes mellitus                                                                                                                                                                                                                         | -8.526 (-14.343 to -3.101)                                       | 0.006   | -2024.754 (-2903.779 to -1124.245)                               | 0.001   | 1.233 (0.491-1.980)                                              | 0.001   |
| Malignancy                                                                                                                                                                                                                                | NA                                                               | NA      | NA                                                               | NA      | 0.715 (0.126-1.358)                                              | 0.023   |
| Admission category - emergent surgery                                                                                                                                                                                                     | NA                                                               | NA      | NA                                                               | NA      | 0.391 (-0.100-0.904)                                             | 0.131   |
| ICU stay. prolonged                                                                                                                                                                                                                       | -6.272 (-9.940 to -2.702)                                        | 0.002   | -913.743 (-1566.921 to -260.837)                                 | 0.005   | 0.923 (0.447-1.426)                                              | 0.002   |
| <b>Models with baseline factors and ICU factors</b>                                                                                                                                                                                       |                                                                  |         |                                                                  |         |                                                                  |         |
| Age                                                                                                                                                                                                                                       | NA                                                               | NA      | NA                                                               | NA      | 0.066 (0.050-0.083)                                              | 0.001   |
| Sex. male                                                                                                                                                                                                                                 | 13.830 (9.696-17.971)                                            | 0.001   | 946.598 (311.847-1568.265)                                       | 0.007   | -1.128 (-1.623 to -0.609)                                        | 0.001   |
| BMI other than 25-40                                                                                                                                                                                                                      | -4.694 (-8.268 to -0.704)                                        | 0.017   | NA                                                               | NA      | -0.426 (-0.922 -0.082)                                           | 0.108   |
| NRS≥5                                                                                                                                                                                                                                     | -3.636 (-9.157 to 1.660)                                         | 0.177   | NA                                                               | NA      | NA                                                               | NA      |
| Diabetes mellitus                                                                                                                                                                                                                         | -9.177 (-15.038 to -3.807)                                       | 0.003   | -2005.767(-2928.841 to -1090.329)                                | 0.001   | 1.359 (0.623-2.083)                                              | 0.001   |
| Malignancy                                                                                                                                                                                                                                | NA                                                               | NA      | NA                                                               | NA      | 0.732 (0.151 -1.351)                                             | 0.008   |
| Admission category. emergent surgery                                                                                                                                                                                                      | NA                                                               | NA      | NA                                                               | NA      | 0.355 (-0.159-0.857)                                             | 0.176   |
| Hypoglycemia                                                                                                                                                                                                                              | NA                                                               | NA      | -1764.531 (-3289.553 to -96.186)                                 | 0.028   | NA                                                               | NA      |
| Mean morning glycaemia > 103 mg/dl                                                                                                                                                                                                        | 2.991 (-0.334-6.782)                                             | 0.112   | NA                                                               | NA      | -0.471 (-0.929-0.047)                                            | 0.069   |
| NMBA                                                                                                                                                                                                                                      | NA                                                               | NA      | -692.840 (-1485.853 – 121.982)                                   | 0.071   | NA                                                               | NA      |
| Benzodiazepines > 1day                                                                                                                                                                                                                    | -8.225 (-11.912 to -5.013)                                       | 0.001   | NA                                                               | NA      | 0.572 (-0.004-1.118)                                             | 0.050   |
| Opiates > 3 days                                                                                                                                                                                                                          | NA                                                               | NA      | -743.458 (-1412.271 to -76.979)                                  | 0.031   | NA                                                               | NA      |
| Clonidine                                                                                                                                                                                                                                 | 5.055 (-1.318 -11.993)                                           | 0.118   | NA                                                               | NA      | NA                                                               | NA      |
| Vasopressors/inotropes > 2 days                                                                                                                                                                                                           | NA                                                               | NA      | NA                                                               | NA      | 0.557 (-0.038 - 1.129)                                           | 0.052   |
| <b>Abbreviations:</b> NRS: nutritional risk score; BMI: body mass index; APACHE II: Acute Physiology And Chronic Health Evaluation; BCa: bias-corrected accelerated confidence intervals obtained by bootstrap sample procedure (n=1000). |                                                                  |         |                                                                  |         |                                                                  |         |
| <b>b</b> Values were transformed to power 2. <b>c</b> Values were reversed (100 minus PF-SF-36) and subsequently transformed to power 0-54.                                                                                               |                                                                  |         |                                                                  |         |                                                                  |         |

Supplemental figure 1

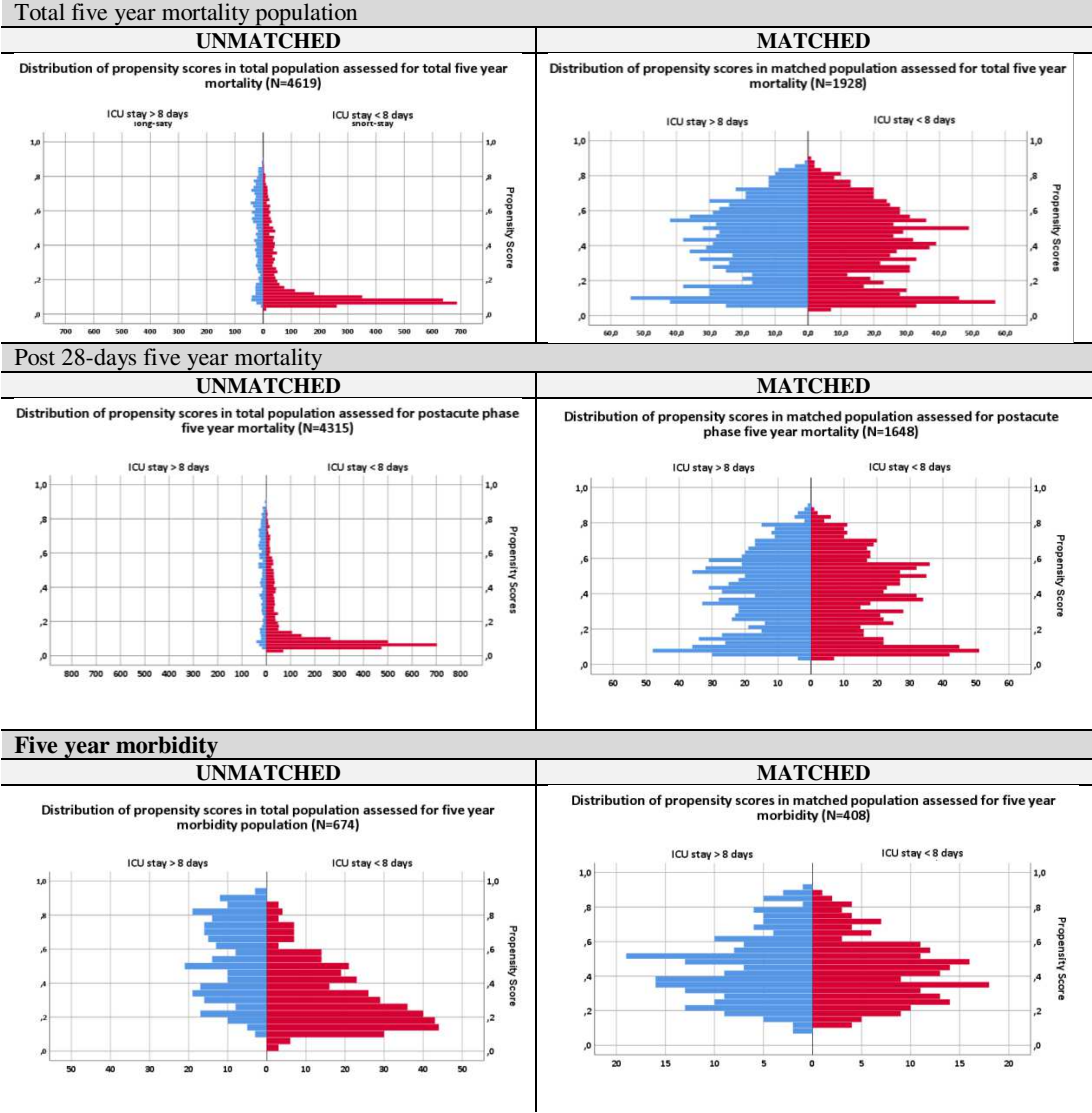

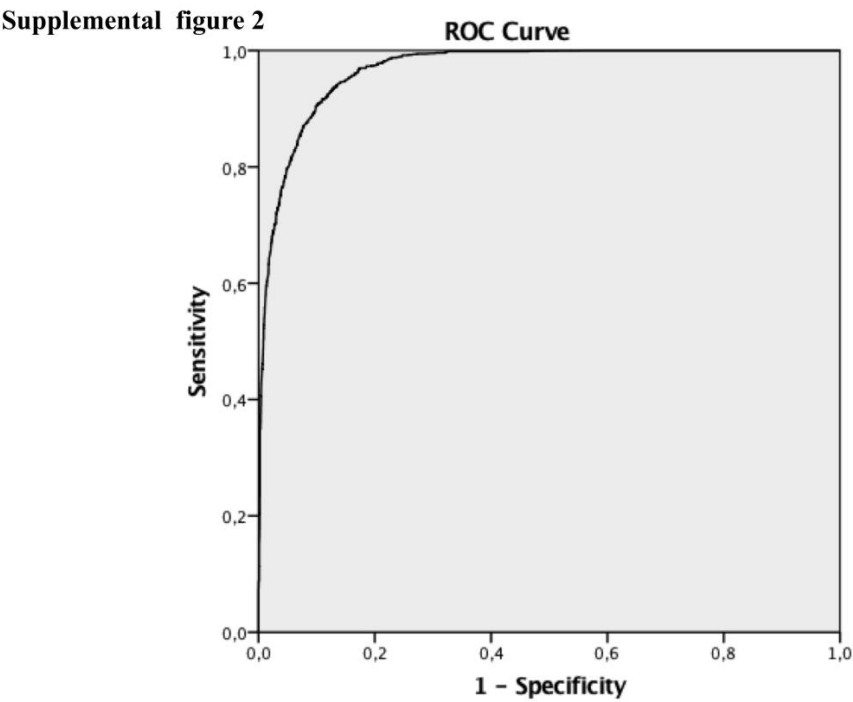

Supplemental figure 3

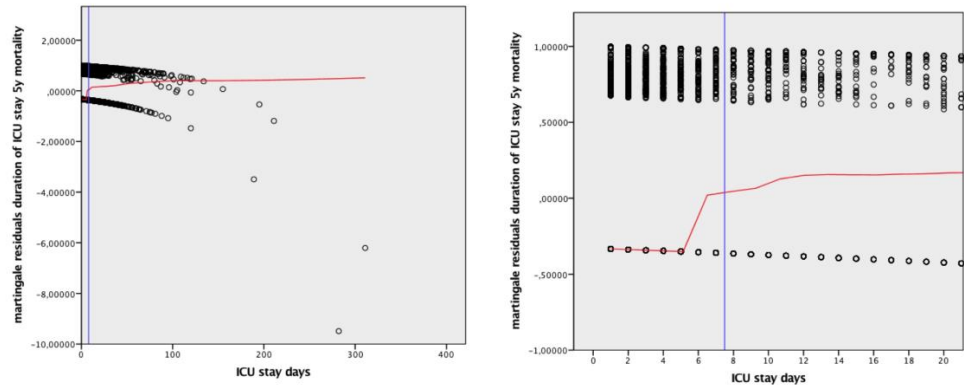

## References

- 1 Herridge MS, Tansey CM, Matte A, et al. Functional disability 5 years after acute respiratory distress syndrome. *NEngl J Med*. 2011;364:1293-304.
- 2 Pfoh ER, Wozniak AW, Colantuoni E, et al. Physical declines occurring after hospital discharge in ARDS survivors: a 5-year longitudinal study. *Intensive Care Med*. 2016;42:1557-66.
- 3 Needham DM, Wozniak AW, Hough CL, et al. Risk factors for physical impairment after acute lung injury in a national, multicenter study. *Am J Respir Crit Care Med*. 2014;189:1214-24.
- 4 Fan E, Dowdy DW, Colantuoni E, et al. Physical complications in acute lung injury survivors: a two-year longitudinal prospective study. *Crit Care Med*. 2014;42:849-59.
- 5 Mathiowetz V, Kashman N, Volland G, et al. Grip and pinch strength: normative data for adults. *Archives of physical medicine and rehabilitation*. 1985;66:69-74.
- 6 Enright PL, Sherrill DL. Reference equations for the six-minute walk in healthy adults. *Am J Respir Crit Care Med*. 1998;158:1384-7.
- 7 Ware JE, Snow KK, Kosinski M, et al. SF-36 health survey: manual and interpretation guide: The Health Institute, New England Medical Center; 1993.
- 8 Ware JE, Kosinski M, Gandek B. SF-36 Health Survey: manual and interpretation guide: Lincoln, R.I. : QualityMetric Incorporated; 2005.
- 9 van der Schaaf M, Dettling DS, Beelen A, et al. Poor functional status immediately after discharge from an intensive care unit. *Disabil Rehabil*. 2008;30:1812-8.
- 10 Hermans G, Clerckx B, Vanhullebusch T, et al. Interobserver agreement of medical research council sum-score and handgrip strength in the intensive care unit. *Muscle Nerve*. 2012;45:18-25.
- 11 Crapo RO, Casaburi R, Coates AL, et al. ATS statement: Guidelines for the six-minute walk test. *American Journal of Respiratory and Critical Care Medicine*. 2002;166:111-7.
- 12 Hermans G, Van Mechelen H, Clerckx B, et al. Acute outcomes and 1-year mortality of intensive care unit-acquired weakness. A cohort study and propensity-matched analysis. *Am J Respir Crit Care Med*. 2014;190:410-20.
- 13 Needham DM, Dinglas VD, Morris PE, et al. Physical and cognitive performance of patients with acute lung injury 1 year after initial trophic versus full enteral feeding. EDEN trial follow-up. *Am J Respir Crit Care Med*. 2013;188:567-76.
- 14 Vanpee G, Segers J, Van Mechelen H, et al. The interobserver agreement of handheld dynamometry for muscle strength assessment in critically ill patients. *Crit Care Med*. 2011;39:1929-34.
- 15 Bohannon RW. Reference values for extremity muscle strength obtained by hand-held dynamometry from adults aged 20 to 79 years. *ArchPhysMedRehabil*. 1997;78:26-32.
- 16 American Thoracic Society/European Respiratory S. ATS/ERS Statement on respiratory muscle testing. *Am J Respir Crit Care Med*. 2002;166:518-624.
- 17 Casaer MP, Mesotten D, Hermans G, et al. Early versus late parenteral nutrition in critically ill adults. *NEngl J Med*. 2011;365:506-17.
- 18 Therneau TM, Grambsch PM, Fleming TR. MARTINGALE-BASED RESIDUALS FOR SURVIVAL MODELS. *Biometrika*. 1990;77:147-60.
- 19 Carr AJ, Gibson B, Robinson PG. Is quality of life determined by expectations or experience? *BMJ*. 2001;322:1240-3.
